# Supplementary material for: Synthesis of urchin-like CdWO4 microspheres via a facile template free hydrothermal method
Source: Royal Society of Chemistry journal article supplement (doi:10.1039/b927420k), 2010-01-01
Supplement: b927420k.pdf [file b927420k.pdf]

# Synthesis of Urchin-like $\text{CdWO}_4$ Microspheres via a Facile Template Free Hydrothermal Method

Yichuan Ling,<sup>a‡</sup> Liang Zhou,<sup>a‡</sup> Lei Tan,<sup>a</sup> Yunhua Wang<sup>a</sup> and Chengzhong Yu<sup>a,b\*</sup>

<sup>a</sup> Department of Chemistry and Shanghai Key Laboratory of Molecular Catalysis and Innovative Materials, Fudan University, Shanghai, 200433, P. R. China.

<sup>b</sup> ARC Centre of Excellence for Functional Nanomaterials and Australian Institute for Bioengineering and Nanotechnology, The University of Queensland, Brisbane, QLD 4072, Australia.

Fax: +86-21-65641740; Tel: +86-21-55665103; E-mail: [czyu@fudan.edu.cn](mailto:czyu@fudan.edu.cn); [c.yu@uq.edu.au](mailto:c.yu@uq.edu.au)

<sup>‡</sup>These authors contribute equally to this paper.

## Supporting Information

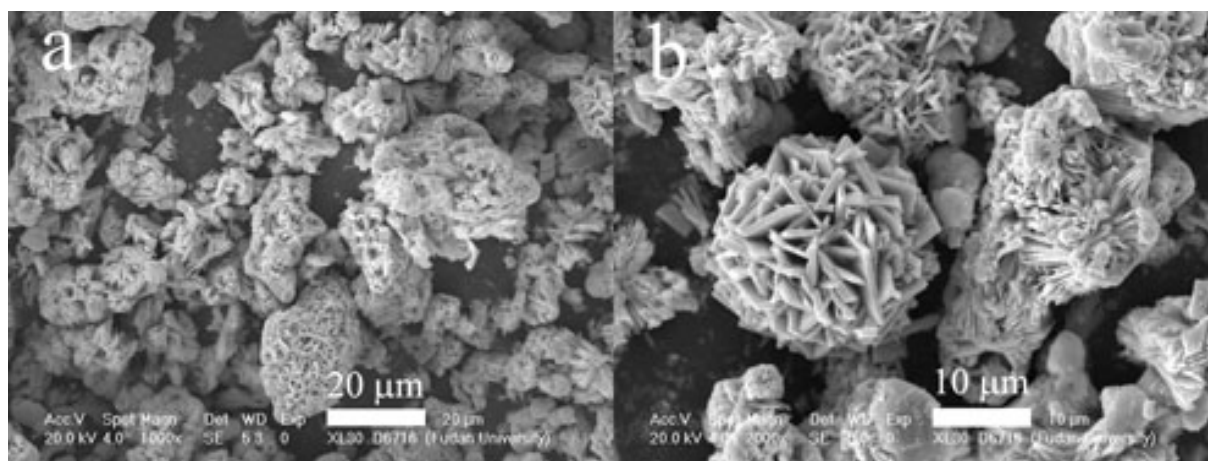

**Figure S1.** SEM images of the products synthesized at a urea / tungsten molar ratio of 0 (a and b).

The hydrothermal treatment temperature is fixed at 473 K and the reaction time is kept at 6 h in all synthesis. The product is mainly composed of plate-like  $\text{CdWO}_4$  particles.

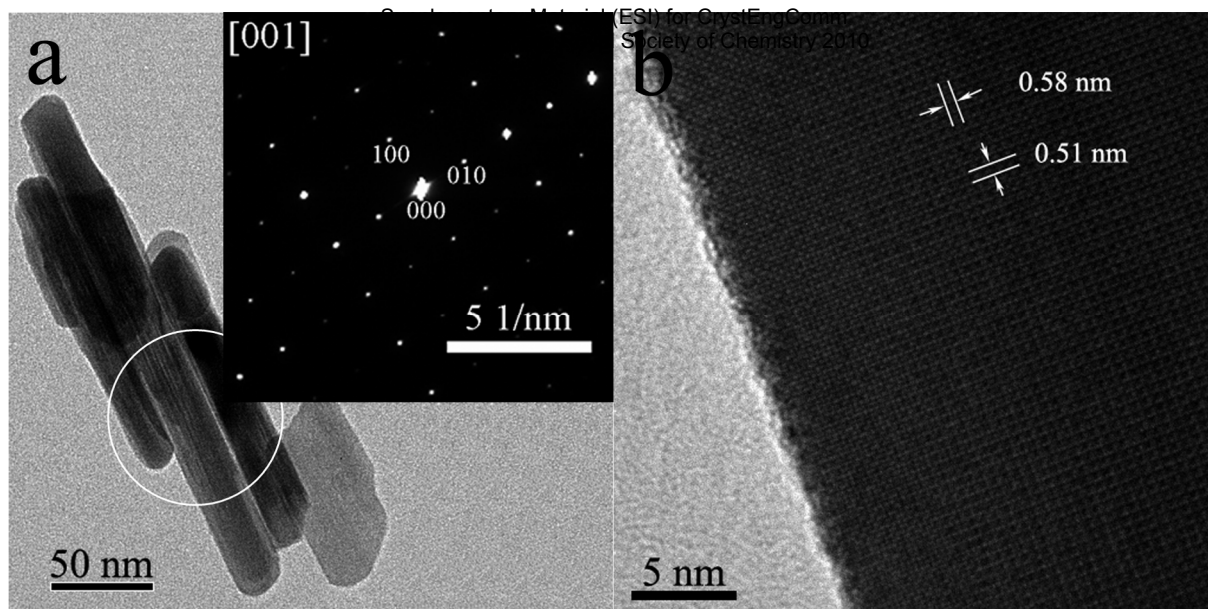

**Figure S2.** TEM (a) and HRTEM images of the CdWO<sub>4</sub> nanorods. Inset of Figure a shows the SAED pattern of the CdWO<sub>4</sub> nanorods taken from the area marked by the white circle.

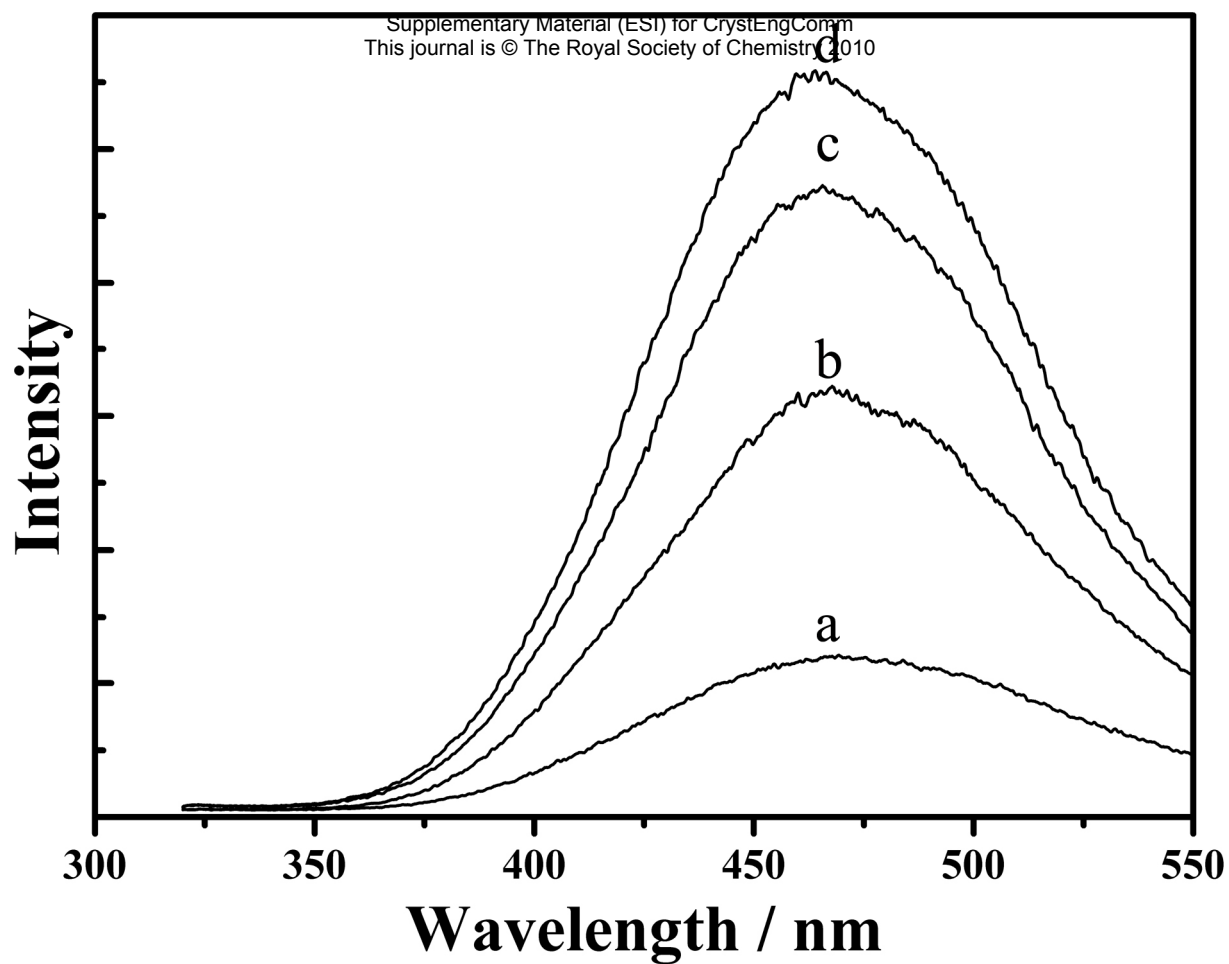

**Figure.S3** PL spectra (excitation wavelength of 293 nm) of CdWO<sub>4</sub> prepared at a hydrothermal treatment of 473 K with a tungsten/urea molar ratio (a) 0.33, (b) 0.66, (c) 1.5 and (d) 2, respectively.

The reaction time is kept at 6 h in all synthesis.
